# Supplementary material
Source: Springer Nature journal article supplement (https://www.springermedizin.de/resource/supplementary/12958_2009_518_MOESM7_ESM.pdf/9568194)

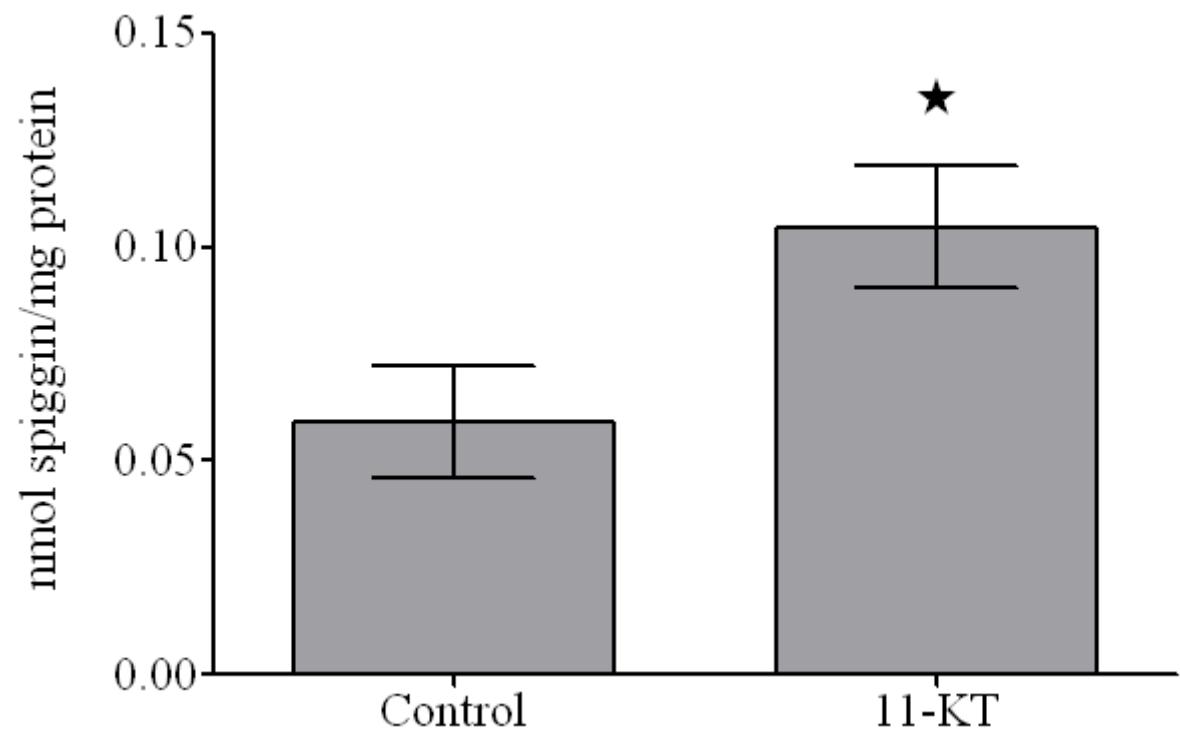

Supplement: MOESM7 [file 9568194]
